# Supplementary material
Source: PubMed Central journal article supplement (PMC2720927)

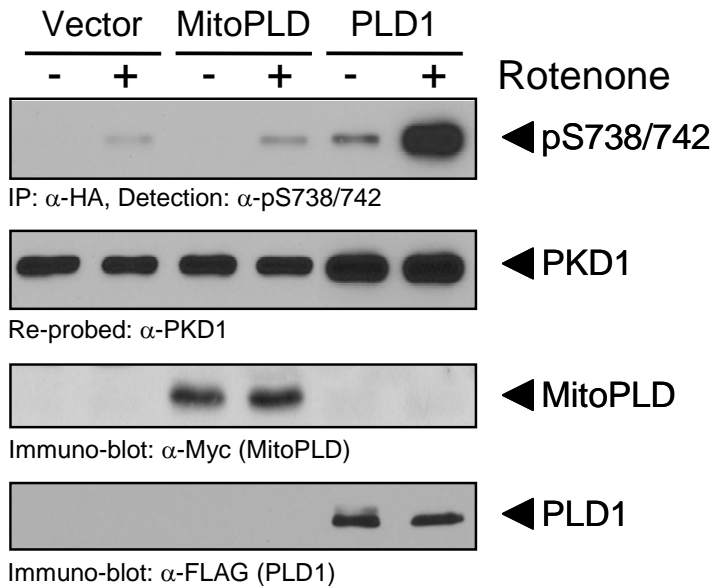

Supplement: jcs.041061_1.pdf [file jcs.041061_1.pdf]
